# Supplementary material for: Preparation of InP quantum dots-TiO2 nanoparticle composites with enhanced visible light induced photocatalytic activity
Source: Royal Society of Chemistry journal article supplement (doi:10.1039/d2ce00365a), 2022-01-01
Supplement: d2ce00365a1.pdf [file d2ce00365a1.pdf]

## Supplementary Information

### **Preparation of InP quantum dots - TiO<sub>2</sub> nanoparticle composites with enhanced visible light induced photocatalytic activity**

Hyekyeong Kwon,<sup>a,b</sup> Suhyeon Kim,<sup>a,b</sup> Sung Bong Kang,<sup>c</sup> and Jiwon Bang<sup>\*,a,b</sup>

<sup>a</sup> Department of Chemistry, and <sup>b</sup> Wonkwang Institute of Materials Science and Technology, Wonkwang University, 460 Iksandae-ro, Iksan, Jeonbuk 54538, Republic of Korea.

<sup>c</sup> School of Earth Sciences and Environmental Engineering, Gwangju Institute of Science and Technology, 123 Cheomdan-Gwagiro, Gwangju, 61005, Republic of Korea.

\* Corresponding author.

Email address : [jwbang1@wku.ac.kr](mailto:jwbang1@wku.ac.kr)

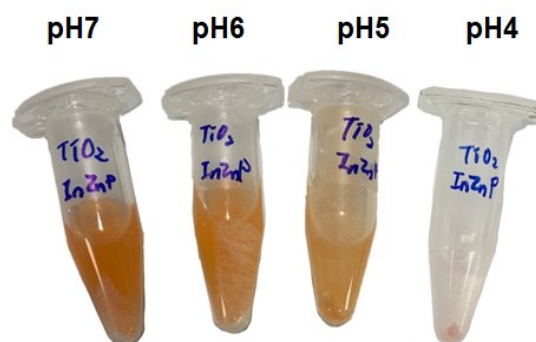

**Figure S1.** Images of InP/ZnSe QDs and  $\text{TiO}_2$  NPs after centrifugation of InP/ZnSe QD and  $\text{TiO}_2$  NP suspension in aqueous solution over pH range of 4–7.

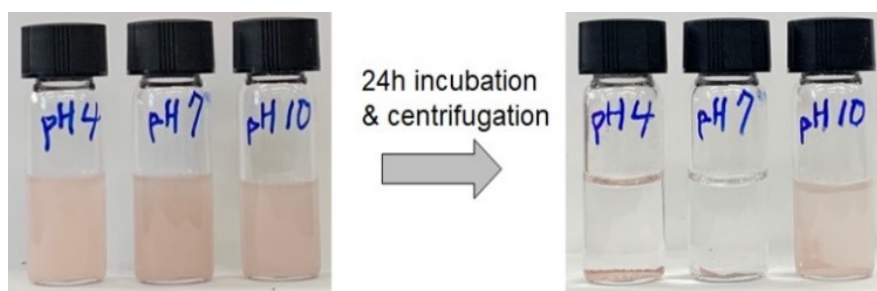

**Figure S2.** Sample vials of InP/ZnSe QD– $\text{TiO}_2$  NP composite powder dispersed in aqueous media with different pH values by sonication (left), and after centrifugation and incubation for 24 h (right).

*Note: In a basic medium (pH 10), the QDs were detached from the  $\text{TiO}_2$  NPs, and free standing QDs were dispersed in the aqueous solution, whereas the  $\text{TiO}_2$  NPs precipitated after centrifugation.*

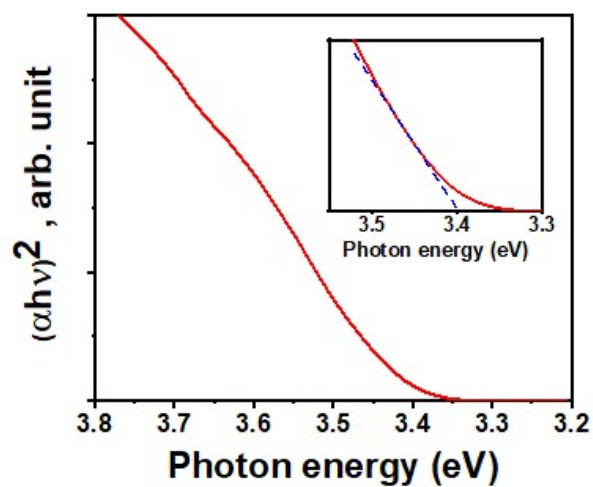

**Figure S3.** Tauc plot of the optical transmittance spectrum for the TiO<sub>2</sub> NPs. Inset is linearly extrapolating the onset region of the spectrum to determine optical band gap of the TiO<sub>2</sub> NPs.

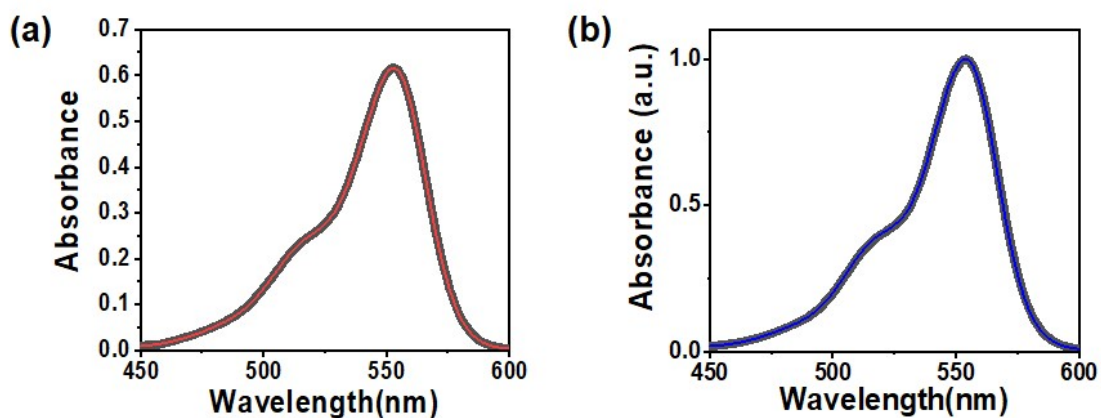

**Figure S4.** (a) Initial (black) UV-vis absorption spectrum of rhodamine B and that after 24 h in dark (red) in presence of InP/ZnSe QD-TiO<sub>2</sub> NP composite. (b) Initial (black) UV-vis absorption spectrum of rhodamine B and that after 16 h under 10mW 505 nm *cw* laser illumination (blue).

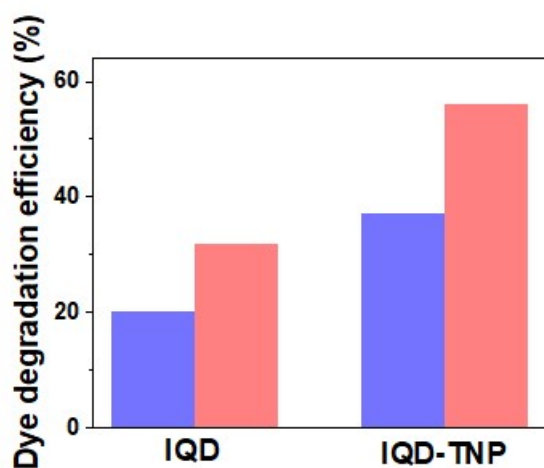

**Figure S5.** The rhodamine B dye degradation efficiencies for the InP/ZnSe QDs and InP/ZnSe QD–TiO<sub>2</sub> NP composites with the different QD contents. Blue and red bars indicate 0.42 and 0.70 nmol of QD contents in the photocatalytic samples, respectively.

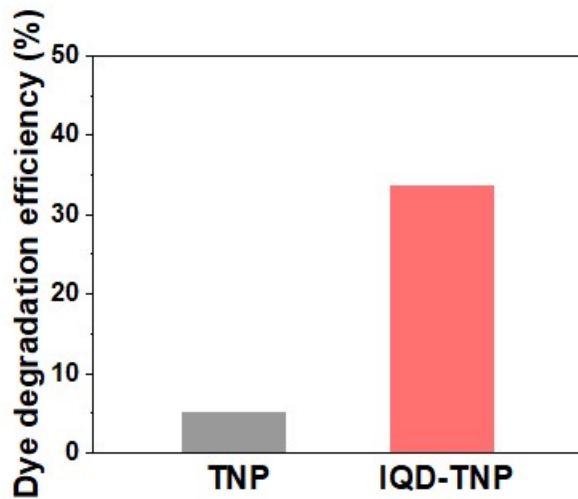

**Figure S6.** Comparison of the rhodamine B dye degradation efficiencies of the TiO<sub>2</sub> NPs (black bar) and InP/ZnSe QD–TiO<sub>2</sub> NP composites (red bar) under a UV lamp (15 W, 312 nm) for 10 min.
